# Supplementary material for: A fungal endophyte helps plants to tolerate root herbivory through changes in gibberellin and jasmonate signaling
Source: PubMed Central journal article supplement (PMC5071772; doi:10.1111/nph.13957), 2016-04-06
Supplement: NPH-211-1065-s001.pdf [file NPH-211-1065-s001.pdf]

**New Phytologist Supporting Information Tables S1–S7**

Article title: A fungal endophyte helps plants to tolerate root herbivory through changes in gibberellin and jasmonate signaling

Authors: Marco Cosme, Jing Lu, Matthias Erb, Michael Joseph Stout, Philipp Franken and Susanne Wurst

Article acceptance date: 25 February 2016

The following Supporting Information is available for this article:

**Table S1** Primers used for qRT-PCR

**Table S2** ANOVA results for Exp I on shoot biomass, tiller number and biomass, length and diameter of roots

**Table S3** Macronutrients and micronutrients in shoots and respective ANOVA or GLM results for Exp I

**Table S4** GLM results for Exp I on OPDA, JA and JA-Ile in leaves and in roots

**Table S5** GLM results for Exp I on transcription level of OsJAR1 and OsKS1 in roots

**Table S6** ANOVA or GLM results for Exp II on biomass of shoots, untreated root-half and treated root-half

**Table S7** ANOVA or GLM results for Exp II on survival and growth of RWW larvae

**Table S1** Primers used for Quantitative real-time PCR analyses

| <b>Gene</b>  | <b>RGAP LOCUS</b> | <b>Description</b> | <b>F-Primers (5'...3')</b>   | <b>R-Primers (5'...3')</b>   |
|--------------|-------------------|--------------------|------------------------------|------------------------------|
| <i>JAR1</i>  | LOC_Os05g50890    | JA synthesis       | AAGGTTTGTGAACCCATCAAACAGC    | AATAATACTTTGCAGCACTTGTTACG   |
| <i>OsKS1</i> | LOC_Os04g52230    | GA synthesis       | GACAAGGGACCAGCTCCAGACATTGGAG | CAGGAGCAGCAATCTGCTCATCCATGGC |
| <i>OsACT</i> | LOC_Os03g50885    | Housekeeping       | TGGACAGGTTATCACCATTGGT       | CCGCAGCTTCCATTCTATG          |

**Table S2** Results of the three-way ANOVA for Exp I of the effects of the root endophyte *Piriformospora indica*, rice water weevil (RWW, *Lissorhoptrus oryzophilus*) adults, RWW larvae, and the interactions between their effects on shoot biomass FW, tiller number, root biomass FW, total root length and average root diameter of 58 d-old rice plants

| Factors       | df | Shoot FW     |              | Tiller No    |              | Root FW      |              | Root length   |                  | Root diameter |                  |
|---------------|----|--------------|--------------|--------------|--------------|--------------|--------------|---------------|------------------|---------------|------------------|
|               |    | <i>F</i>     | <i>P</i>     | <i>F</i>     | <i>P</i>     | <i>F</i>     | <i>P</i>     | <i>F</i>      | <i>P</i>         | <i>F</i>      | <i>P</i>         |
| Endophyte (E) | 1  | 2,984        | 0,090        | <b>5,906</b> | <b>0,018</b> | <b>5,177</b> | <b>0,027</b> | <b>9,056</b>  | <b>0,004</b>     | 0,005         | 0,947            |
| Adult (A)     | 1  | 0,970        | 0,329        | 0,024        | 0,877        | 0,238        | 0,628        | 1,555         | 0,218            | 0,046         | 0,831            |
| Larva (L)     | 1  | <b>9,954</b> | <b>0,003</b> | 0,287        | 0,594        | <b>1,966</b> | <b>0,167</b> | <b>16,060</b> | <b>&lt;0,001</b> | <b>12,295</b> | <b>&lt;0,001</b> |
| E x A         | 1  | 0,845        | 0,362        | 0,179        | 0,674        | 2,330        | 0,133        | <b>7,882</b>  | <b>0,007</b>     | 0,774         | 0,383            |
| E x L         | 1  | <b>5,371</b> | <b>0,024</b> | <b>9,534</b> | <b>0,003</b> | <b>7,001</b> | <b>0,011</b> | <b>21,696</b> | <b>&lt;0,001</b> | 0,194         | 0,661            |
| A x L         | 1  | 0,097        | 0,756        | 0,389        | 0,535        | 0,126        | 0,724        | 1,128         | 0,293            | 0,389         | 0,535            |
| E x A x L     | 1  | 0,017        | 0,897        | 0,055        | 0,816        | 0,621        | 0,434        | <b>6,176</b>  | <b>0,016</b>     | 1,315         | 0,256            |
| Residuals     | 56 |              |              |              |              |              |              |               |                  |               |                  |

Significant *P*-values (< 0.050) are given in bold, marginally significant *P*-values (< 0.100) are given in italic.

**Table S3** Mean values of macronutrients (mg g<sup>-1</sup> DW) and micronutrients (µg g<sup>-1</sup> DW) in shoots of 58-d-old rice plants for Exp I as affected by the root endophyte *Piriformospora indica*, rice water weevil (RWW, *Lissorhoptrus oryzophilus*) adults, RWW larvae and their fully crossed combinations in comparison to the untreated control as well as the respective results of the three-way factorial ANOVA or GLM

| Macronutrients<br>mg g <sup>-1</sup> DW | Nitrogen (N) |      | Phosphorus (P) |       | Potassium (K) |               | Calcium (Ca)     |       | Magnesium (Mg) |              | Sulfur (S) |               |                  |       |       |       |       |       |       |
|-----------------------------------------|--------------|------|----------------|-------|---------------|---------------|------------------|-------|----------------|--------------|------------|---------------|------------------|-------|-------|-------|-------|-------|-------|
|                                         | Mean         | SE   | Mean           | SE    | Mean          | SE            | Mean             | SE    | Mean           | SE           | Mean       | SE            |                  |       |       |       |       |       |       |
| Control                                 | 29,05 ±      | 1,75 | 5,447 ±        | 0,082 | 51,22 ±       | 0,80          | 4,863 ±          | 0,141 | 2,543 ±        | 0,082        | 2,775 ±    | 0,079         |                  |       |       |       |       |       |       |
| Adult (A)                               | 28,92 ±      | 1,88 | 5,529 ±        | 0,119 | 52,56 ±       | 0,93          | 4,897 ±          | 0,193 | 2,591 ±        | 0,063        | 2,899 ±    | 0,097         |                  |       |       |       |       |       |       |
| Larva (L)                               | 28,67 ±      | 3,00 | 4,459 ±        | 0,281 | 46,08 ±       | 3,36          | 6,078 ±          | 0,552 | 2,394 ±        | 0,085        | 2,980 ±    | 0,198         |                  |       |       |       |       |       |       |
| AL                                      | 31,08 ±      | 1,82 | 4,510 ±        | 0,212 | 50,76 ±       | 1,57          | 6,231 ±          | 0,193 | 2,492 ±        | 0,104        | 3,272 ±    | 0,162         |                  |       |       |       |       |       |       |
| Endophyte (E)                           | 29,89 ±      | 1,73 | 5,514 ±        | 0,098 | 52,79 ±       | 1,53          | 4,786 ±          | 0,094 | 2,439 ±        | 0,072        | 2,781 ±    | 0,115         |                  |       |       |       |       |       |       |
| EA                                      | 26,69 ±      | 1,24 | 5,773 ±        | 0,079 | 53,12 ±       | 1,20          | 4,689 ±          | 0,122 | 2,552 ±        | 0,071        | 2,953 ±    | 0,129         |                  |       |       |       |       |       |       |
| EL                                      | 27,90 ±      | 1,29 | 4,856 ±        | 0,066 | 50,54 ±       | 0,77          | 5,641 ±          | 0,208 | 2,545 ±        | 0,056        | 2,966 ±    | 0,066         |                  |       |       |       |       |       |       |
| EAL                                     | 28,51 ±      | 1,45 | 4,827 ±        | 0,058 | 49,28 ±       | 1,15          | 5,297 ±          | 0,109 | 2,396 ±        | 0,066        | 2,863 ±    | 0,127         |                  |       |       |       |       |       |       |
| Factors                                 | GLM          |      |                |       | GLM           |               |                  | GLM   |                |              | GLM        |               |                  | ANOVA |       |       | ANOVA |       |       |
|                                         | df1          | df2  | F              | P     | df2           | F             | P                | df2   | F              | P            | df2        | F             | P                | df2   | F     | P     | df2   | F     | P     |
| Endophyte                               | 1            | 62   | 0,752          | 0,390 | 62            | <b>5,205</b>  | <b>0,026</b>     | 62    | 1,128          | 0,293        | 62         | <b>6,743</b>  | <b>0,012</b>     | 56    | 0,169 | 0,682 | 56    | 1,006 | 0,320 |
| Adult                                   | 1            | 61   | 0,010          | 0,919 | 61            | 0,651         | 0,423            | 61    | 1,116          | 0,295        | 61         | 0,159         | 0,692            | 56    | 0,254 | 0,616 | 56    | 1,795 | 0,186 |
| Larva                                   | 1            | 60   | 0,074          | 0,787 | 60            | <b>64,938</b> | <b>&lt;0,001</b> | 60    | <b>7,353</b>   | <b>0,009</b> | 60         | <b>39,657</b> | <b>&lt;0,001</b> | 56    | 1,928 | 0,171 | 56    | 3,452 | 0,068 |
| E x A                                   | 1            | 59   | 0,834          | 0,365 | 59            | 0,031         | 0,862            | 59    | 2,175          | 0,146        | 59         | 1,023         | 0,316            | 56    | 0,720 | 0,400 | 56    | 0,915 | 0,343 |
| E x L                                   | 1            | 58   | 0,121          | 0,730 | 58            | 1,730         | 0,194            | 58    | 0,06           | 0,807        | 58         | 1,527         | 0,222            | 56    | 0,850 | 0,360 | 56    | 1,769 | 0,189 |
| A x L                                   | 1            | 57   | 1,461          | 0,232 | 57            | 0,337         | 0,564            | 57    | 0,195          | 0,661        | 57         | 0,029         | 0,866            | 56    | 0,975 | 0,328 | 56    | 0,087 | 0,769 |
| E x A x L                               | 1            | 56   | 0,092          | 0,763 | 56            | 0,280         | 0,599            | 56    | 1,301          | 0,259        | 56         | 0,182         | 0,672            | 56    | 2,094 | 0,153 | 56    | 1,490 | 0,227 |

(Continued next page)

(Continuation of Table S3)

| Micronutrients<br>$\mu\text{g g}^{-1}$ DW | Zinc (Zn) |         | Manganese (Mn) |          | Iron (Fe) |               | Copper (Cu)      |        | Boron (B) |          | Molybdenum (Mo) |          |          |     |               |                  |       |              |              |
|-------------------------------------------|-----------|---------|----------------|----------|-----------|---------------|------------------|--------|-----------|----------|-----------------|----------|----------|-----|---------------|------------------|-------|--------------|--------------|
|                                           | Mean      | SE      | Mean           | SE       | Mean      | SE            | Mean             | SE     | Mean      | SE       | Mean            | SE       |          |     |               |                  |       |              |              |
| Control                                   | 117,2     | ± 4,45  | 382,1          | ± 10,47  | 286,9     | ± 38,26       | 13,78            | ± 0,67 | 9,626     | ± 0,287  | 1,953           | ± 0,082  |          |     |               |                  |       |              |              |
| Adult (A)                                 | 120,7     | ± 6,19  | 403,7          | ± 14,50  | 257,1     | ± 48,01       | 13,51            | ± 0,56 | 9,306     | ± 0,213  | 2,040           | ± 0,112  |          |     |               |                  |       |              |              |
| Larva (L)                                 | 130,5     | ± 12,04 | 316,8          | ± 40,49  | 261,3     | ± 20,36       | 17,96            | ± 4,87 | 11,633    | ± 0,876  | 2,249           | ± 0,080  |          |     |               |                  |       |              |              |
| AL                                        | 116,0     | ± 7,67  | 345,6          | ± 27,26  | 316,1     | ± 60,82       | 11,75            | ± 0,68 | 12,262    | ± 0,835  | 2,370           | ± 0,126  |          |     |               |                  |       |              |              |
| Endophyte (E)                             | 118,6     | ± 3,91  | 401,7          | ± 6,75   | 243,2     | ± 18,89       | 13,14            | ± 0,80 | 9,678     | ± 0,272  | 2,072           | ± 0,097  |          |     |               |                  |       |              |              |
| EA                                        | 120,1     | ± 4,15  | 396,2          | ± 6,11   | 242,3     | ± 28,76       | 13,74            | ± 0,82 | 9,625     | ± 0,195  | 2,115           | ± 0,105  |          |     |               |                  |       |              |              |
| EL                                        | 118,7     | ± 4,38  | 365,5          | ± 10,12  | 264,0     | ± 28,18       | 13,57            | ± 0,26 | 11,306    | ± 0,576  | 2,154           | ± 0,057  |          |     |               |                  |       |              |              |
| EAL                                       | 111,5     | ± 4,96  | 360,8          | ± 10,68  | 317,7     | ± 41,16       | 12,98            | ± 0,57 | 11,055    | ± 0,853  | 2,105           | ± 0,077  |          |     |               |                  |       |              |              |
| Factors                                   | ANOVA     |         |                |          | GLM       |               |                  | ANOVA  |           |          | GLM             |          |          | GLM |               |                  | ANOVA |              |              |
|                                           | df1       | df2     | <i>F</i>       | <i>P</i> | df2       | <i>F</i>      | <i>P</i>         | df2    | <i>F</i>  | <i>P</i> | df2             | <i>F</i> | <i>P</i> | df2 | <i>F</i>      | <i>P</i>         | df2   | <i>F</i>     | <i>P</i>     |
| Endophyte                                 | 1         | 56      | 0,399          | 0,530    | 62        | 1,927         | 0,171            | 56     | 0,036     | 0,850    | 62              | 0,467    | 0,497    | 62  | 0,489         | 0,487            | 56    | 0,383        | 0,538        |
| Adult                                     | 1         | 56      | 0,872          | 0,354    | 61        | 0,537         | 0,467            | 56     | 0,055     | 0,815    | 61              | 1,577    | 0,215    | 61  | 0,000         | 0,999            | 56    | 0,564        | 0,456        |
| Larva                                     | 1         | 56      | 0,058          | 0,811    | 60        | <b>12,659</b> | <b>&lt;0,001</b> | 56     | 1,889     | 0,175    | 60              | 0,156    | 0,695    | 60  | <b>23,289</b> | <b>&lt;0,001</b> | 56    | <b>6,829</b> | <b>0,012</b> |
| E x A                                     | 1         | 56      | 0,044          | 0,835    | 59        | 1,227         | 0,273            | 56     | 0,273     | 0,604    | 59              | 1,583    | 0,214    | 59  | 0,137         | 0,713            | 56    | 0,644        | 0,426        |
| E x L                                     | 1         | 56      | 0,669          | 0,417    | 58        | 0,892         | 0,349            | 56     | 0,216     | 0,644    | 58              | 0,273    | 0,603    | 58  | 1,313         | 0,257            | 56    | <b>4,313</b> | <b>0,042</b> |
| A x L                                     | 1         | 56      | 2,041          | 0,159    | 57        | 0,021         | 0,884            | 56     | 1,731     | 0,194    | 57              | 1,928    | 0,170    | 57  | 0,204         | 0,654            | 56    | 0,047        | 0,829        |
| E x A x L                                 | 1         | 56      | 0,149          | 0,701    | 56        | 0,014         | 0,907            | 56     | 0,045     | 0,832    | 56              | 0,841    | 0,363    | 56  | 0,478         | 0,492            | 56    | 0,229        | 0,635        |

df1, degrees of freedom; df2, degrees of freedom of residuals. Significant *P*-values (< 0.050) are given in bold, marginally significant *P*-values (< 0.100) are given in italic.

**Table S4** Results of the three-way GLM for Exp I of the effects of the root endophyte *Piriformospora indica*, rice water weevil (RWW, *Lissorhoptrus oryzophilus*) adults, RWW larvae and the interactions between their effects on 12-oxophytodienoic acid (OPDA), jasmonic acid (JA) and jasmonoyl-isoleucine (JA-Ile) in leaves and in roots of 58-d-old rice plants

| Factors       | Leaves |     |              |              |              |              |              |              | Roots  |       |       |              |              |               |                  |   |    |  |  |  |        |  |  |  |
|---------------|--------|-----|--------------|--------------|--------------|--------------|--------------|--------------|--------|-------|-------|--------------|--------------|---------------|------------------|---|----|--|--|--|--------|--|--|--|
|               | OPDA   |     |              |              | JA           |              |              |              | JA-Ile |       |       |              | OPDA         |               |                  |   | JA |  |  |  | JA-Ile |  |  |  |
|               | df1    | df2 | F            | P            | F            | P            | F            | P            | df2    | F     | P     | F            | P            | F             | P                | F | P  |  |  |  |        |  |  |  |
| Endophyte (E) | 1      | 62  | 0,000        | 0,995        | 0,441        | 0,509        | 0,888        | 0,350        | 59     | 1,040 | 0,312 | <b>6,048</b> | <b>0,017</b> | 3,155         | <i>0,081</i>     |   |    |  |  |  |        |  |  |  |
| Adult (A)     | 1      | 61  | <b>4,732</b> | <b>0,034</b> | <b>6,420</b> | <b>0,014</b> | <b>5,340</b> | <b>0,025</b> | 58     | 0,336 | 0,565 | 1,524        | 0,222        | 1,513         | 0,224            |   |    |  |  |  |        |  |  |  |
| Larva (L)     | 1      | 60  | 3,483        | <i>0,067</i> | <b>4,554</b> | <b>0,037</b> | 3,274        | <i>0,076</i> | 57     | 0,032 | 0,858 | <b>7,385</b> | <b>0,009</b> | <b>14,864</b> | <b>&lt;0,001</b> |   |    |  |  |  |        |  |  |  |
| E x A         | 1      | 59  | 0,237        | 0,628        | 1,662        | 0,203        | 1,424        | 0,238        | 56     | 0,069 | 0,794 | 0,829        | 0,367        | 0,984         | 0,326            |   |    |  |  |  |        |  |  |  |
| E x L         | 1      | 58  | 0,594        | 0,444        | 0,047        | 0,829        | 0,609        | 0,438        | 55     | 2,079 | 0,155 | <b>4,133</b> | <b>0,047</b> | 1,657         | 0,204            |   |    |  |  |  |        |  |  |  |
| A x L         | 1      | 57  | 0,047        | 0,830        | 2,015        | 0,161        | 1,368        | 0,247        | 54     | 0,196 | 0,660 | 0,588        | 0,447        | 0,024         | 0,877            |   |    |  |  |  |        |  |  |  |
| E x A x L     | 1      | 56  | 0,608        | 0,439        | 0,533        | 0,469        | 0,348        | 0,558        | 53     | 0,291 | 0,592 | 0,674        | 0,415        | 0,909         | 0,345            |   |    |  |  |  |        |  |  |  |

df1, degrees of freedom; df2, degrees of freedom of residuals. Significant *P*-values (< 0.050) are given in bold, marginally significant *P*-values (< 0.100) are given in italic.

**Table S5** Results of the three-way GLM for Exp I of the effects of the root endophyte *Piriformospora indica*, rice water weevil (RWW, *Lissorhoptrus oryzophilus*) adults, RWW larvae and the interactions between their effects on the relative transcription levels of *OsJAR1* and *OsKS1* genes in roots of 58 d-old rice plants

| Factors       |     |     | <i>OsJAR1</i> |              | <i>OsKS1</i>  |                  |
|---------------|-----|-----|---------------|--------------|---------------|------------------|
|               | df1 | df2 | <i>F</i>      | <i>P</i>     | <i>F</i>      | <i>P</i>         |
| Endophyte (E) | 1   | 59  | 0,574         | 0,452        | <b>6,037</b>  | <b>0,017</b>     |
| Adult (A)     | 1   | 58  | 0,166         | 0,685        | 0,000         | 0,993            |
| Larva (L)     | 1   | 57  | 0,138         | 0,711        | <b>48,198</b> | <b>&lt;0,001</b> |
| E x A         | 1   | 56  | 0,013         | 0,910        | 1,723         | 0,195            |
| E x L         | 1   | 55  | 3,475         | <i>0,068</i> | 0,768         | 0,385            |
| A x L         | 1   | 54  | 2,436         | 0,125        | 0,109         | 0,743            |
| E x A x L     | 1   | 53  | 0,678         | 0,414        | 3,420         | <i>0,070</i>     |

df1, degrees of freedom; df2, degrees of freedom of residuals. Significant *P*-values (< 0.050) are given in bold, marginally significant *P*-values (< 0.100) are given in italic.

**Table S6** Results of the three-way ANOVA or GLM for Exp II of the effects of the root endophyte *Piriformospora indica*, rice water weevil (RWW, *Lissorhoptrus oryzophilus*) adults, RWW larvae and the interactions between their effects on the FW of shoots, untreated root-half, and treated root-half of 58-d-old WT, *coi1-18*, and *Eui1-OX* plant lines.

| WT            |     | Shoot |              |              |     | Untreated root-half |              |     | Treated root-half |              |  |
|---------------|-----|-------|--------------|--------------|-----|---------------------|--------------|-----|-------------------|--------------|--|
| Factors       | df1 | ANOVA |              | GLM          |     |                     | GLM          |     |                   |              |  |
|               |     | df2   | F            | P            | df2 | F                   | P            | df2 | F                 | P            |  |
| Endophyte (E) | 1   | 56    | <b>4,738</b> | <b>0,034</b> | 62  | 3,290               | <i>0,075</i> | 62  | <b>5,223</b>      | <b>0,026</b> |  |
| Adult (A)     | 1   | 56    | 0,197        | 0,659        | 61  | 0,486               | 0,488        | 61  | 0,354             | 0,554        |  |
| Larva (L)     | 1   | 56    | 0,620        | 0,434        | 60  | 0,217               | 0,643        | 60  | <b>4,030</b>      | <b>0,049</b> |  |
| E x A         | 1   | 56    | 0,014        | 0,906        | 59  | 0,003               | 0,959        | 59  | 0,020             | 0,887        |  |
| E x L         | 1   | 56    | 0,219        | 0,642        | 58  | 1,178               | 0,282        | 58  | 0,720             | 0,400        |  |
| A x L         | 1   | 56    | 1,842        | 0,180        | 57  | 0,810               | 0,372        | 57  | 3,234             | <i>0,078</i> |  |
| E x A x L     | 1   | 56    | 0,179        | 0,674        | 56  | 0,220               | 0,641        | 56  | 0,950             | 0,334        |  |

  

| <i>coi1-18</i> |     | Shoot |               |                  |     | Untreated root-half |                  |     | Treated root-half |                  |  |
|----------------|-----|-------|---------------|------------------|-----|---------------------|------------------|-----|-------------------|------------------|--|
| Factors        | df1 | GLM   |               | GLM              |     |                     | GLM              |     |                   |                  |  |
|                |     | df2   | F             | P                | df2 | F                   | P                | df2 | F                 | P                |  |
| Endophyte (E)  | 1   | 61    | <b>16,305</b> | <b>&lt;0,001</b> | 61  | <b>19,430</b>       | <b>&lt;0,001</b> | 61  | <b>17,243</b>     | <b>&lt;0,001</b> |  |
| Adult (A)      | 1   | 60    | 2,295         | 0,136            | 60  | 1,870               | 0,177            | 60  | 1,609             | 0,210            |  |
| Larva (L)      | 1   | 59    | 0,140         | 0,710            | 59  | 0,028               | 0,869            | 59  | 0,666             | 0,418            |  |
| E x A          | 1   | 58    | 0,263         | 0,610            | 58  | 0,352               | 0,556            | 58  | 0,791             | 0,378            |  |
| E x L          | 1   | 57    | 0,558         | 0,458            | 57  | 1,121               | 0,294            | 57  | 0,019             | 0,892            |  |
| A x L          | 1   | 56    | 0,242         | 0,625            | 56  | 0,524               | 0,472            | 56  | 0,720             | 0,400            |  |
| E x A x L      | 1   | 55    | 0,000         | 0,997            | 55  | 0,979               | 0,327            | 55  | 0,323             | 0,572            |  |

  

| <i>Eui1-OX</i> |     | Shoot |              |              |     | Untreated root-half |       |     | Treated root-half |              |  |
|----------------|-----|-------|--------------|--------------|-----|---------------------|-------|-----|-------------------|--------------|--|
| Factors        | df1 | GLM   |              | GLM          |     |                     | GLM   |     |                   |              |  |
|                |     | df2   | F            | P            | df2 | F                   | P     | df2 | F                 | P            |  |
| Endophyte (E)  | 1   | 57    | 2,155        | 0,148        | 57  | 2,599               | 0,113 | 57  | 0,581             | 0,449        |  |
| Adult (A)      | 1   | 56    | 0,975        | 0,328        | 56  | 0,861               | 0,358 | 56  | 0,578             | 0,451        |  |
| Larva (L)      | 1   | 55    | <b>5,612</b> | <b>0,022</b> | 55  | 2,505               | 0,120 | 55  | <b>5,789</b>      | <b>0,020</b> |  |
| E x A          | 1   | 54    | 0,703        | 0,406        | 54  | 1,018               | 0,318 | 54  | 0,480             | 0,492        |  |
| E x L          | 1   | 53    | 0,212        | 0,647        | 53  | 0,000               | 0,999 | 53  | 0,002             | 0,963        |  |
| A x L          | 1   | 52    | 0,279        | 0,600        | 52  | 1,267               | 0,266 | 52  | 0,567             | 0,455        |  |
| E x A x L      | 1   | 51    | 1,203        | 0,278        | 51  | 0,226               | 0,637 | 51  | 0,252             | 0,618        |  |

df1, degrees of freedom; df2, degrees of freedom of residuals. Significant *P*-values (< 0.050) are given in bold, marginally significant *P*-values (< 0.100) are given in italic.



**Table S7** Results of the two-way ANOVA or GLM for Exp II of the effects of the root endophyte *Piriformospora indica*, rice water weevil (RWW, *Lissorhoptrus oryzophilus*) adults, and the interaction between their effects on survival and growth of RWW larvae 28 d after neonate infestation in roots of 58-d-old WT, *coi1-18* or *Eui1-OX* plant lines

| Factors       | df1 | WT       |       |       |        |       |       | <i>coi1-18</i> |              |              |        |       |       | <i>Eui1-OX</i> |       |       |        |       |              |
|---------------|-----|----------|-------|-------|--------|-------|-------|----------------|--------------|--------------|--------|-------|-------|----------------|-------|-------|--------|-------|--------------|
|               |     | Survival |       |       | Growth |       |       | Survival       |              |              | Growth |       |       | Survival       |       |       | Growth |       |              |
|               |     | GLM      |       |       | GLM    |       |       | ANOVA          |              |              | GLM    |       |       | ANOVA          |       |       | GLM    |       |              |
|               |     | df2      | F     | P     | df2    | F     | P     | df2            | F            | P            | df2    | F     | P     | df2            | F     | P     | df2    | F     | P            |
| Endophyte (E) | 1   | 30       | 0,131 | 0,721 | 27     | 1,085 | 0,308 | 28             | <b>9,048</b> | <b>0,006</b> | 29     | 0,083 | 0,775 | 28             | 0,688 | 0,414 | 22     | 0,161 | 0,693        |
| Adults (A)    | 1   | 29       | 0,066 | 0,799 | 26     | 0,071 | 0,792 | 28             | 0,692        | 0,412        | 28     | 0,072 | 0,791 | 28             | 0,199 | 0,659 | 21     | 4,122 | <i>0,056</i> |
| E x A         | 1   | 28       | 0,237 | 0,630 | 25     | 0,035 | 0,854 | 28             | 1,479        | 0,234        | 27     | 0,005 | 0,944 | 28             | 0,066 | 0,799 | 20     | 0,016 | 0,900        |

WT, wild type; df1, degrees of freedom; df2, degrees of freedom of residuals. Significant *P*-values (< 0.050) are given in bold, marginally significant *P*-values (< 0.100) are given in italic.
